# Supplementary material for: Kluyveromyces marxianus, an Attractive Yeast for Ethanolic Fermentation in the Presence of Imidazolium Ionic Liquids
Source: MDPI journal article supplement (doi:10.3390/ijms19030887), 2018-03-16
Supplement: s1 [file s1]

**Supplementary materials:** Supplementary materials can be found online.

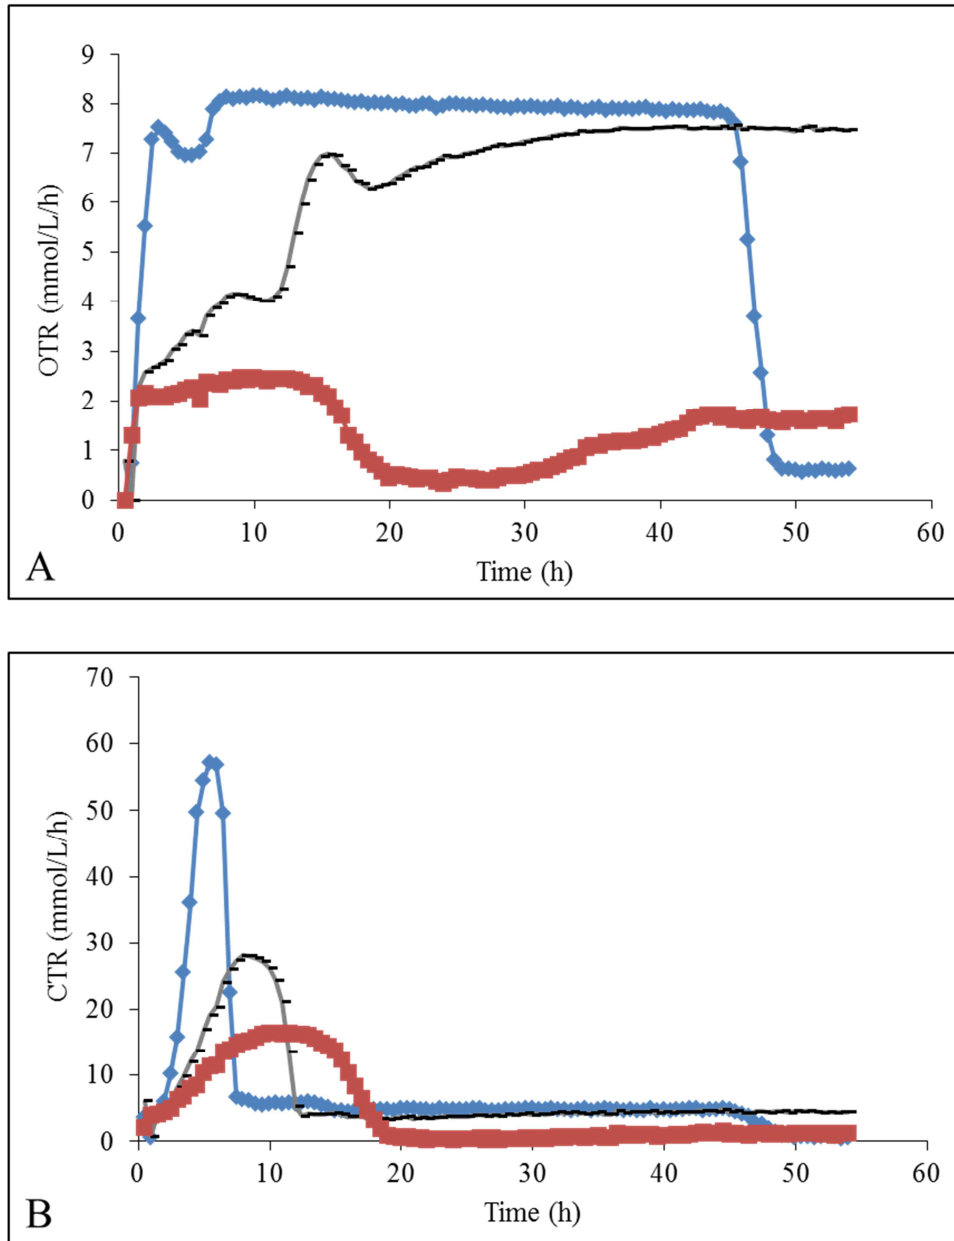

**Fig. S1.** Oxygen Transfer Rate OTR (A) and Carbon dioxide Transfer Rate CTR (B) of *K. marxianus* grown in: ◆ YMD; ■ YMD + 0.5% [Emim][OAc]; ■ YMD + 1% [Emim][OAc]. The results are mean of two repetitions. Error bars are not represented to avoid overloading the figure.
